# Supplementary material for: Detecting PKD1 variants in polycystic kidney disease patients by single‐molecule long‐read sequencing
Source: PubMed Central journal article supplement — Hum Mutat. 2017 May 29;38(7):870–9. doi: 10.1002/humu.23223 (PMC5488171; doi:10.1002/humu.23223), 2017-05-29
Supplement: HUMU-38-870-s001.pdf [file HUMU-38-870-s001.pdf]

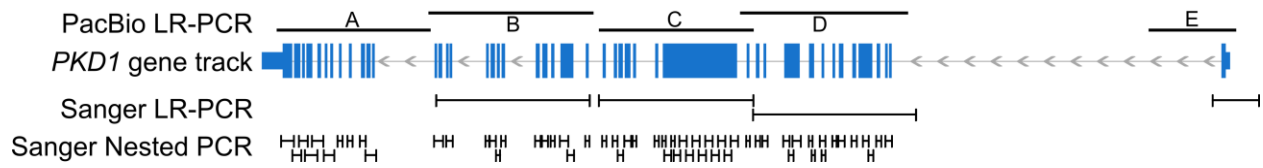

**Supp. Figure S1:** Enrichment of *PKD1* gene (NM\_001009944.2) with 5 LR-PCR fragments used for PacBio, and 4 for Sanger sequencing followed by nested-PCR amplification for obtaining Sanger sequencing reads.

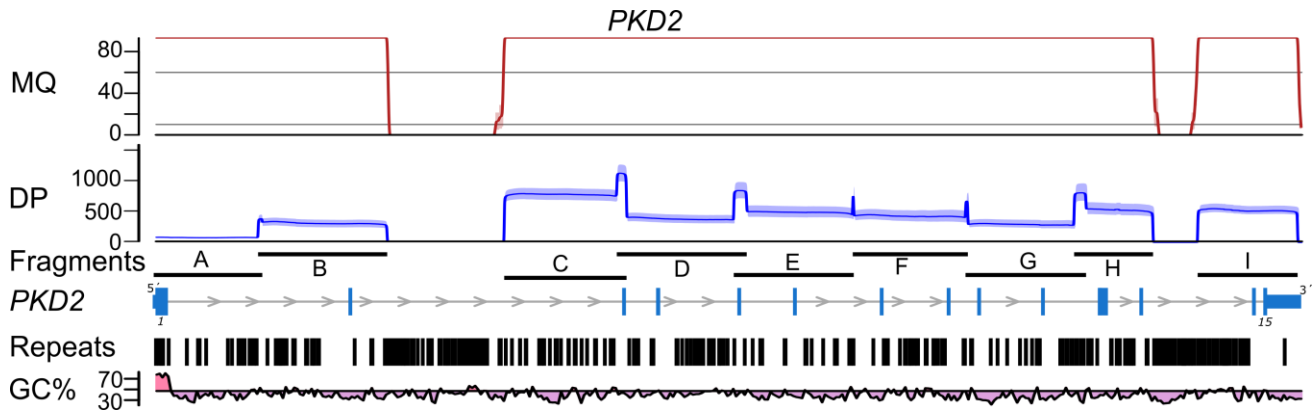

**Supp. Figure S2:** Mapping quality (MQ; in Phred quality scores; values >90 were scaled down for visualization purposes) and sequencing depth (DP; in number of reads) of uniquely aligned sequenced molecules to *PKD2* (NM\_000297.3) for 9 LR-PCR fragments amplified. Mapping quality of alignments with even coverage distribution along the amplified fragments (Fragments), including regions with repetitive elements (Repeats) and high GC-content (GC%). Despite fragment A showing lower coverage compared to other fragments, it had sufficient coverage for variant calling within the exon regions, e.g. the first exon of *PKD2* with average coverage  $\geq 71x$  (min.  $\geq 43x$ ; max. 111x) (Supp. Table S4).

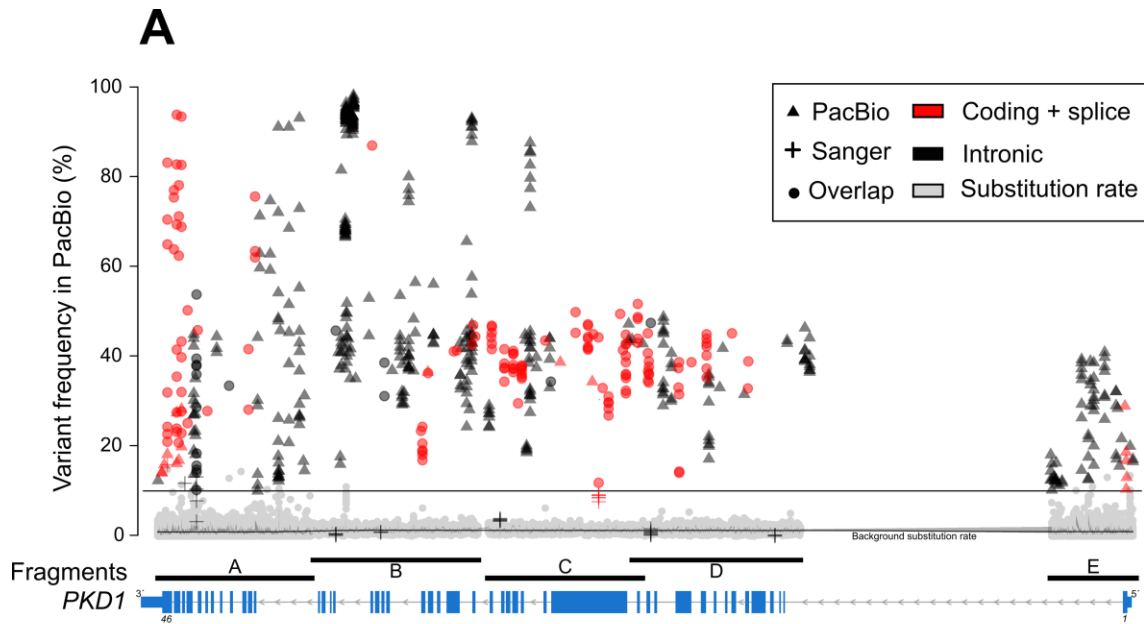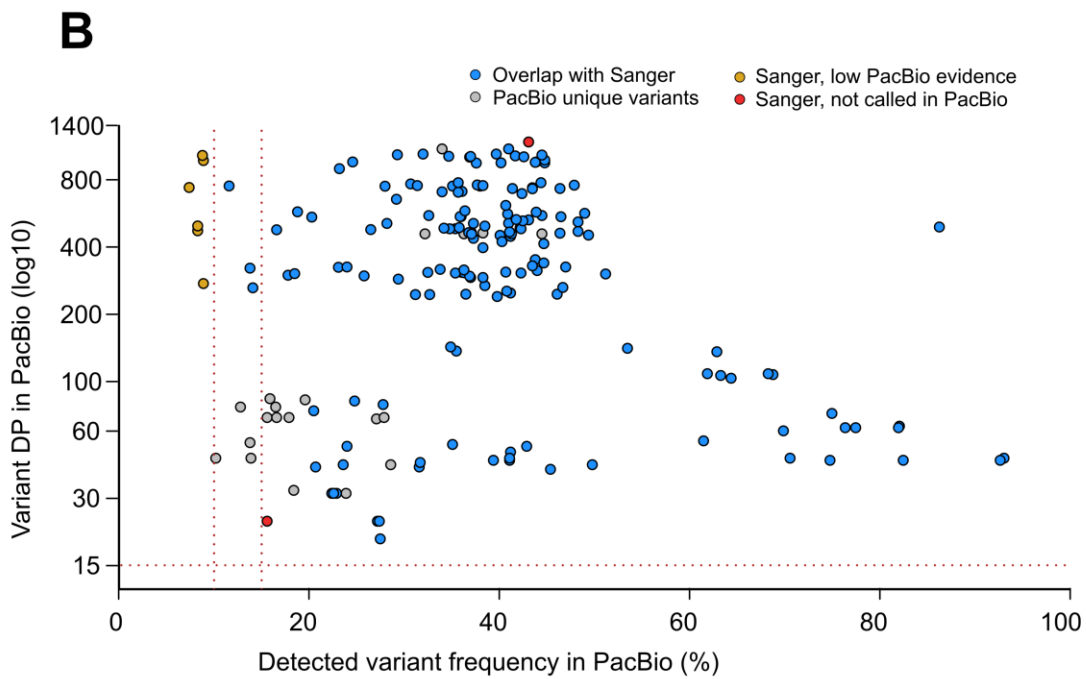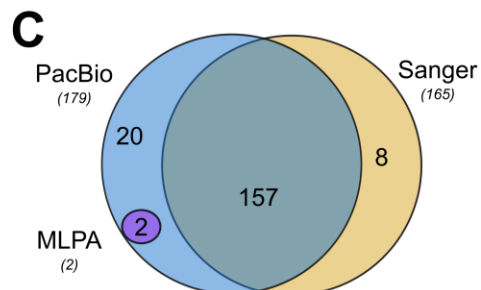

**Supp. Figure S3:** Comparison with current diagnostic assay. (A.) Small variants identified by PacBio were randomly distributed along the length of the amplified regions of *PKDI* gene locus (x axis; NM\_001009944.2) showing no blind spots where no variants could not be detected. When compared to Sanger sequencing results, variants detected with both diagnostic approaches distributed over *PKDI* gene could be visualized (circles). The variant frequency (y axis) of variants solely detected by Sanger (crosses) or PacBio (triangles) which are majorly located in regions where no Sanger sequencing data was available, mostly introns (black). The average per-base mismatch rates (grey dots and average trend line) show the high sensitivity of our long-read sequencing method to detect substitutions. To highlight variants of high significance, coding or splice site variants (red) were colored to be visually identified from other intronic variants (black). (B.) The variant frequencies (x axis) with respect to the applied thresholds (dotted line) of all exonic and splice site variants detected either by Sanger or PacBio show the 2 Sanger variants that were not confirmed in PacBio (red) despite having sufficient sequencing depth (y axis) and variant frequency to be called. However, other 6 variants were potentially considered as PCR artifacts detected in Sanger sequencing despite high sequencing depth (yellow), which showed low variant frequency below the applied frequency thresholds (vertical dotted lines). Variants that passed the applied sequencing-based filtering thresholds and were detected by both diagnostic methods are shown as blue dots, whereas the variants that were detected by PacBio only are shown as grey dots. (C.) Overall, the comparison between our long-read sequencing approach with the standard ADPKD diagnostics assays show that from the 179 coding or splice site variants that were detected by PacBio, 2 were large deletions also identified by MLPA, and 157 were small variants also identified by Sanger (yellow). Only 8 small variants were not confirmed by PacBio from which 6 showed low sequencing data support (Supp. Figure S5B).

The remaining 20 variants solely identified by PacBio comprehend 17 likely Sanger false negatives, and 3 low-confident calls of the allelic reconstruction of c.6657\_6671del (Supp. Table S9).

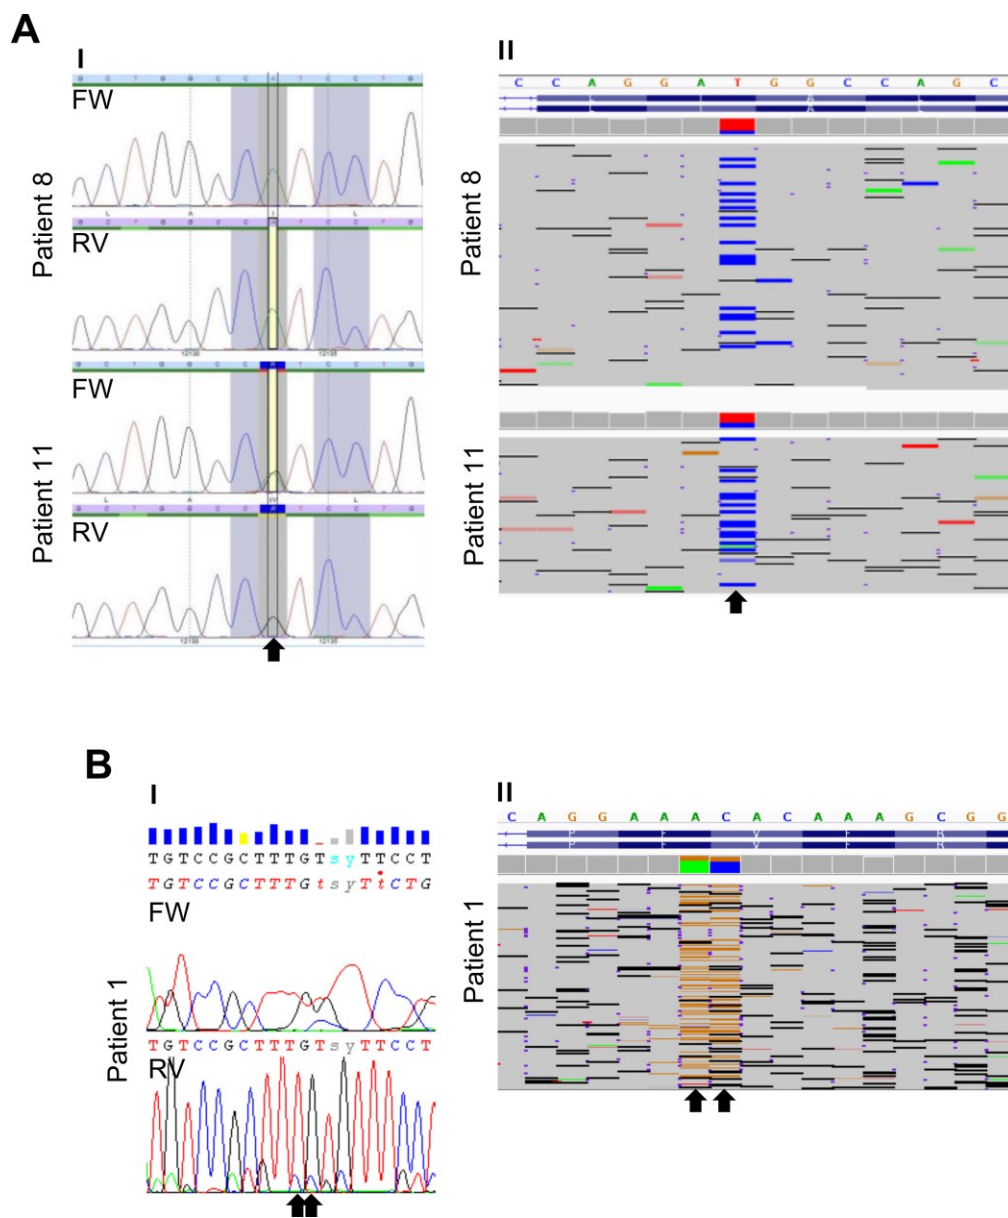

**Supp. Figure S4:** Discordances identified between Sanger and PacBio sequencing are a clear example to show the sensitivity of direct long-read sequencing. (A.) The polymorphic substitution c.12133A>G correctly identified in patient 11 by Sanger (A<sub>I</sub>) and PacBio (A<sub>II</sub>) was clearly missed by Sanger sequencing in patient 8 (NM\_001009944.2). (B.) Similarly, the polymorphism c.9195\_9196delinsCC was not identified by Sanger sequencing due to unspecific forward signal (B<sub>I</sub>), whereas in PacBio at least the substitution c.9195G>C was identified (B<sub>II</sub>) (RefSeq NM\_001009944.2).

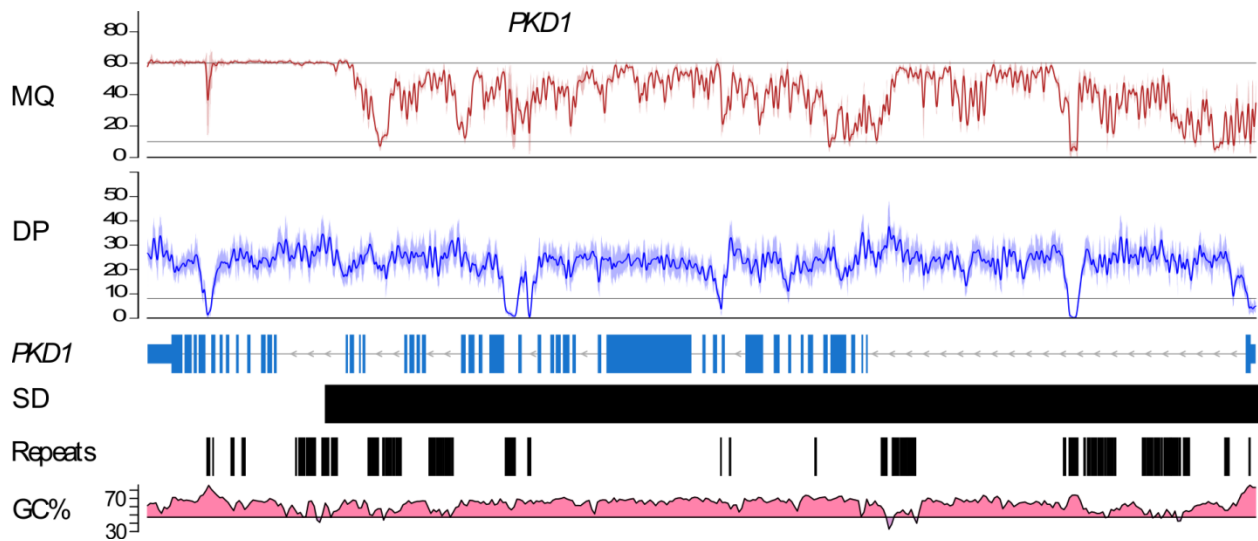

**Supp. Figure S5:** Impact of *PKD1* (NM\_001009944.2) inaccessible and unresolvable regions using NGS data. Mapping quality (MQ) and depth (DP) are affected by the presence of repetitive elements (Repeats), percentage of GC content (GC%), and segmental duplications (SD). Inaccessible and unresolvable regions, detected using a publicly available 9 WGS dataset (Sun et al. 2015), disrupt the MQ and DP where SDs from multiple *PKD1* pseudogenes interferes with the alignments of NGS short-reads. Dips in DP and MQ occur where repeats and high GC% overlap, even within gene coding regions (blue).

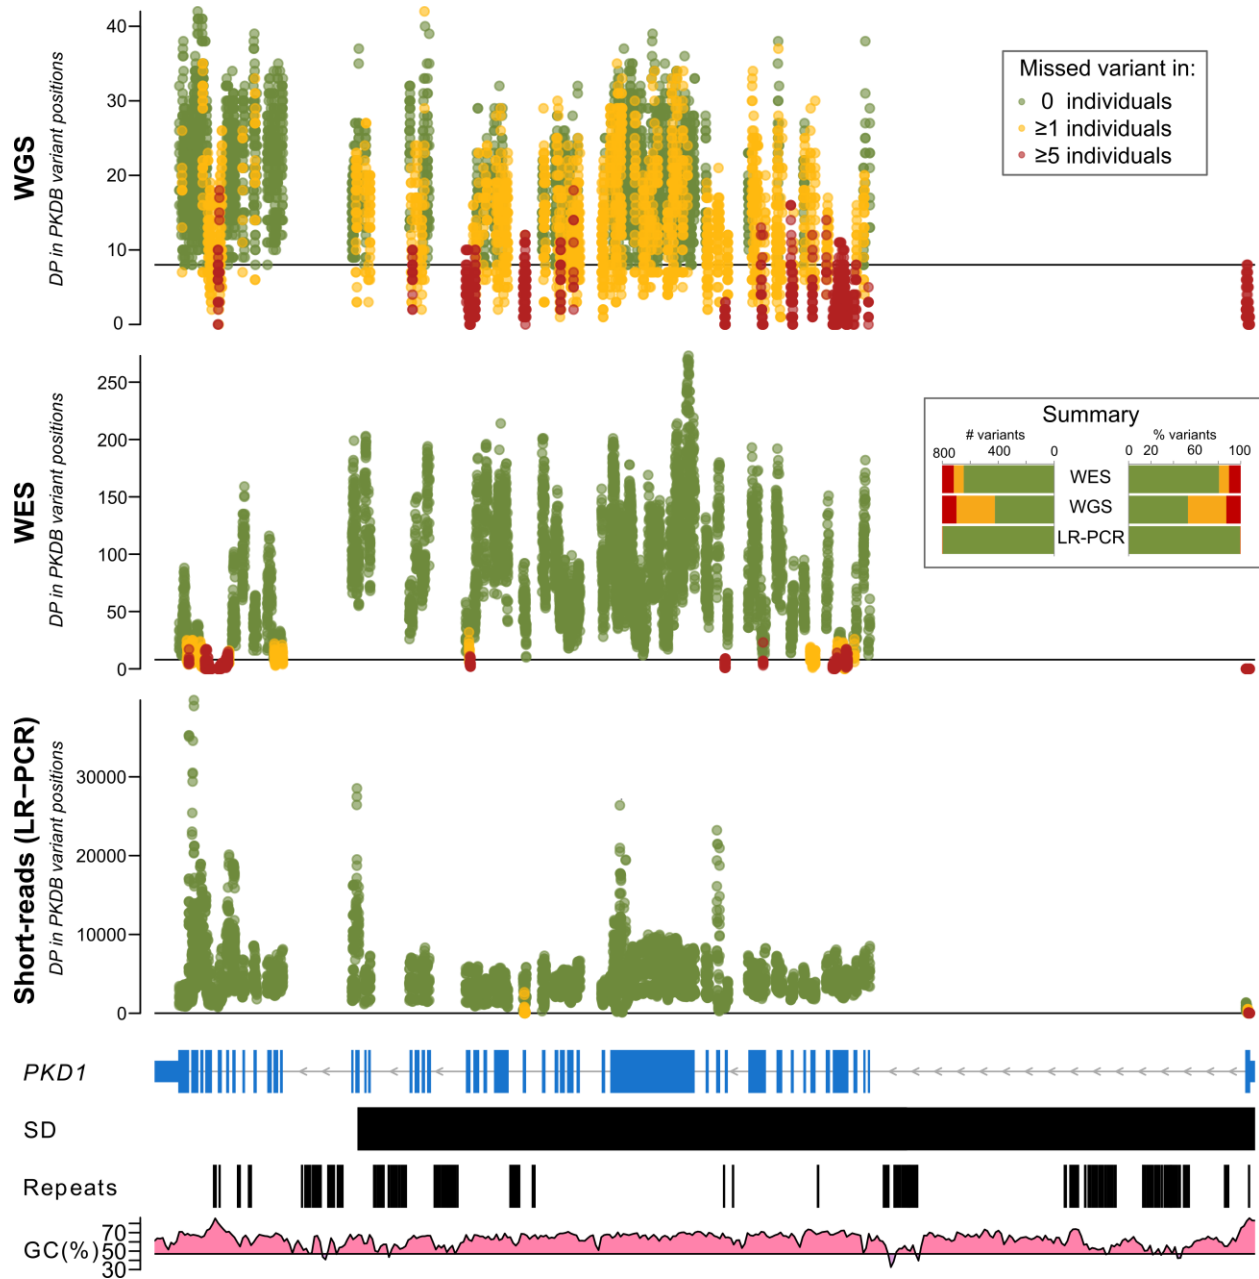

**Supp. Figure S6:** Loss of power to detect pathogenic variants with NGS approaches for *PKD1* gene (RefSeq NM\_001009944.2). 12% of known pathogenic variants from the ADPKD database (PKDB) would be missed due to poor sequencing depth (red dots) regardless of the NGS sequencing strategy utilized for (WGS or WES) (exons 1, 5, 11, 12, 26, 35, 36, 41, 42 and 46). These poorly sequenced variants appear to be enriched in regions with segmental duplications



(SD), repetitive elements (Repeats), and mainly with high percentage of GC-content (GC%) such is the case for exon 1. Short-read sequencing using LR-PCR enrichment of *PKDI* regions substantially improves the coverage of known pathogenic variants with only a 1.3% of missed variants due to low or poor coverage.

**Supp. Table S1:** Amplified LR-PCR fragments and sequencing pools for the SMRT library preparation of *PKD1* and *PKD2*.

| Amplified fragments | Exons covered | Fragment size (Kb) | Sequencing pool* | Strand** | LR-PCR Primer sequence (5'-3')*** |
|---------------------|---------------|--------------------|------------------|----------|-----------------------------------|
| <b>PKD1 A</b>       | 35-46         | 7.5                | B                | FW       | GAGCAGGCTCATGGGGCTTTGTAGGAGC      |
|                     |               |                    |                  | RV       | ACAGCCCCTGTACCTGAGGACTCG          |
| <b>PKD1 B</b>       | 22-34         | 8.1                | C                | FW       | ATGTGAAGAGGTGCCTTGTGTGGT          |
|                     |               |                    |                  | RV       | TAAAAACCCGCCATAATTTCTCACTGC       |
| <b>PKD1 C</b>       | 14-21         | 7.6                | C                | FW       | GTTCCCTGTCTGTTGGGAGGTAAC          |
|                     |               |                    |                  | RV       | CTGCGTTCACACAGGACAGAACG           |
| <b>PKD1 D</b>       | 2-13          | 8                  | C                | FW       | CCGAGTAGCTGGAACACAGTTACACACT      |
|                     |               |                    |                  | RV       | CACCCAGTTACCTCCCAACAGAC           |
| <b>PKD1 E</b>       | 1             | 4.3                | A                | FW       | GCGGAGCGTGAAAAATAGCTCGT           |
|                     |               |                    |                  | RV       | TACTGCTTTGCTTGACCAGCCTTAAAGA      |
| <b>PKD2 A</b>       | 1             | 7.2                | B                | FW       | GCAGGATTCTGTTGCTAGAAGTCAGTGC      |
|                     |               |                    |                  | RV       | CCTTCTATCTAGCTTCTTTCCATCCCAGC     |
| <b>PKD2 B</b>       | 2             | 7.9                | C                | FW       | CCTGTAACCCCACCATGGAATGGGC         |
|                     |               |                    |                  | RV       | AGGTAGGCTTGGAGGGTGCAACTGG         |
| <b>PKD2 C</b>       | 3             | 7.5                | B                | FW       | TACCCCTTAAAGATTTTCCTCACA          |
|                     |               |                    |                  | RV       | CTGTGATACTCATGCATTGAAA            |
| <b>PKD2 D</b>       | 3-5           | 8                  | C                | FW       | CTGTGTTGGGGCCTGTGCAGATCAGC        |
|                     |               |                    |                  | RV       | GGGGGACTTGGTGATGGAACATGTGGC       |
| <b>PKD2 E</b>       | 5-6           | 7.4                | B                | FW       | TTGGGACTACATTGACCTACTAA           |
|                     |               |                    |                  | RV       | TTCATTCTGTATCCCCAGTGC             |
| <b>PKD2 F</b>       | 7-8           | 7.1                | B                | FW       | GTTTTCTGAGCACCTACTATGTACTTGC      |
|                     |               |                    |                  | RV       | TAAACCTTGACAACAGTCACCCTCG         |
| <b>PKD2 G</b>       | 9-10          | 7.4                | B                | FW       | TGAACTCCAGGGCCTCACACTGTCC         |
|                     |               |                    |                  | RV       | GCGAACTTTAGACCTGACCTTGCTTTGC      |
| <b>PKD2 H</b>       | 11-13         | 4.9                | A                | FW       | AAATGTTGGGGCTGGACATGGTGGC         |
|                     |               |                    |                  | RV       | ATGCACAAGGAACATTCTTCAGGACG        |
| <b>PKD2 I</b>       | 14-15         | 6.2                | A                | FW       | CAGGTCTTTGTCTGCTAAGTCTGA          |
|                     |               |                    |                  | RV       | TTGCAAGTGAAATGAAAAACAGT           |

\*Pooling of similar size fragments was performed to optimize loading and sequencing efficiency.

\*\*FW, forward strand; RV, reverse strand.

\*\*\*Primers included a 5' M13-tail (TGTAACGACGGCCAGT for FW primers, and CAGGAAACAGCTATGACC for RV primers).

**Supp. Table S2:** Per patient targeted PCR amplification and alignment statistics of number of reads and unique molecules, sequenced with SMRT-Seq.

| Patient # | Subreads | # Unique molecules (reads) |       |               | Base coverage per exon ( $\pm 20$ bp)* |        |         |
|-----------|----------|----------------------------|-------|---------------|----------------------------------------|--------|---------|
|           |          | PKD1                       | PKD2  | PKD1 Pseudog. | >10x                                   | >20x   | >30x    |
| 1         | 47,842   | 2,217                      | 5,756 | 581           | 100%                                   | 100%   | 93.64%  |
| 2         | 31,889   | 1,932                      | 3,611 | 427           | 100%                                   | 100%   | 99.95%  |
| 3         | 29,200   | 1,631                      | 2,980 | 367           | 100%                                   | 100%   | 99.53%  |
| 4         | 16,929   | 1,008                      | 1,719 | 158           | 100%                                   | 99.84% | 84.63%  |
| 5         | 31,925   | 1,584                      | 3,757 | 236           | 100%                                   | 100%   | 100%    |
| 6         | 23,344   | 1,405                      | 2,413 | 159           | 100%                                   | 99.95% | 89.32%  |
| 7         | 26,497   | 1,268                      | 3,043 | 276           | 100%                                   | 100%   | 99.995% |
| 8         | 36,737   | 2,208                      | 4,469 | 202           | 100%                                   | 100%   | 100%    |
| 9         | 38,224   | 1,979                      | 4,973 | 203           | 100%                                   | 99.15% | 98.6%   |
| 10        | 44,782   | 2,667                      | 4,976 | 684           | 100%                                   | 91.22% | 84.12%  |
| 11        | 51,389   | 2,520                      | 6,054 | 631           | 100%                                   | 100%   | 100%    |
| 12        | 42,132   | 2,357                      | 5,043 | 412           | 100%                                   | 100%   | 100%    |
| 13        | 41,092   | 2,205                      | 4,517 | 627           | 100%                                   | 100%   | 100%    |
| 14        | 46,520   | 2,530                      | 5,010 | 570           | 100%                                   | 100%   | 100%    |
| 15        | 46,276   | 2,880                      | 5,294 | 254           | 100%                                   | 100%   | 100%    |
| 16        | 48,624   | 3,958                      | 5,543 | 562           | 100%                                   | 100%   | 100%    |
| 17        | 46,126   | 3,163                      | 4,948 | 557           | 100%                                   | 100%   | 100%    |
| 18        | 44,009   | 2,671                      | 5,485 | 334           | 100%                                   | 100%   | 99.99%  |
| 19        | 45,185   | 2,684                      | 5,439 | 332           | 100%                                   | 100%   | 100%    |
| Mean:     | 38,902   | 2,256                      | 4,478 | 399           | 100%                                   | 99.48% | 97.36%  |

*Reads were filtered by read length >500 bp and read quality over 75% within SMRT Analysis. Only properly mapped sequences with mapping quality over >30 that were primary alignments and not PCR or optical duplicates were counted.*

*\*Per exon percentages calculated using the total number of exon ( $\pm 20$  bp) bases from the targeted design (18,259 bp).*

**Supp. Table S3:** Total number of unique molecules (reads) sequenced for each amplicon.

| Amplified fragments | Exons covered | # <i>Unique Molecules (reads)</i> |        |       |      |       |
|---------------------|---------------|-----------------------------------|--------|-------|------|-------|
|                     |               | Total                             | Mean   | Min.  | Max. |       |
| <b>PKD1</b>         | A             | 35-46                             | 11,271 | 593   | 300  | 1,580 |
| <b>PKD1</b>         | B             | 22-34                             | 14,439 | 760   | 396  | 1,814 |
| <b>PKD1</b>         | C             | 14-21                             | 23,526 | 1,238 | 487  | 1,845 |
| <b>PKD1</b>         | D             | 2-13                              | 24,281 | 1,278 | 519  | 1,830 |
| <b>PKD1</b>         | E             | 1                                 | 1,650  | 87    | 35   | 153   |
| <b>PKD2</b>         | A             | 1                                 | 7,982  | 420   | 221  | 737   |
| <b>PKD2</b>         | B             | 2                                 | 8,737  | 460   | 220  | 831   |
| <b>PKD2</b>         | C             | 3                                 | 24,132 | 1,270 | 480  | 1,748 |
| <b>PKD2</b>         | D             | 3-5                               | 32,089 | 1,689 | 610  | 2,459 |
| <b>PKD2</b>         | E             | 5-6                               | 25,433 | 1,339 | 478  | 2,079 |
| <b>PKD2</b>         | F             | 7-8                               | 23,673 | 1,246 | 483  | 2,197 |
| <b>PKD2</b>         | G             | 9-10                              | 24,187 | 1,273 | 436  | 2,196 |
| <b>PKD2</b>         | H             | 11-13                             | 16,372 | 862   | 256  | 1,547 |
| <b>PKD2</b>         | I             | 14-15                             | 12,007 | 632   | 240  | 886   |

**Supp. Table S4:** Base coverage statistics as average min, average mean, and average maximum, calculated from coverage stats retrieved for each patient and exon ( $\pm 20$ bp).

| <i>Gene</i> | <i>Exon</i> | Base coverage |             |             |
|-------------|-------------|---------------|-------------|-------------|
|             |             | <i>Mean</i>   | <i>Min.</i> | <i>Max.</i> |
| <i>PKD1</i> | 1           | 55            | 24          | 91          |
| <i>PKD1</i> | 2           | 422           | 175         | 646         |
| <i>PKD1</i> | 3           | 420           | 168         | 638         |
| <i>PKD1</i> | 4           | 414           | 163         | 627         |
| <i>PKD1</i> | 5           | 408           | 150         | 616         |
| <i>PKD1</i> | 6           | 403           | 150         | 586         |
| <i>PKD1</i> | 7           | 402           | 149         | 577         |
| <i>PKD1</i> | 8           | 402           | 150         | 573         |
| <i>PKD1</i> | 9           | 400           | 147         | 563         |
| <i>PKD1</i> | 10          | 401           | 145         | 564         |
| <i>PKD1</i> | 11          | 400           | 141         | 558         |
| <i>PKD1</i> | 12          | 392           | 139         | 545         |
| <i>PKD1</i> | 13          | 378           | 139         | 528         |
| <i>PKD1</i> | 14          | 756           | 306         | 1,224       |
| <i>PKD1</i> | 15          | 754           | 257         | 1,256       |
| <i>PKD1</i> | 16          | 734           | 258         | 1,186       |
| <i>PKD1</i> | 17          | 739           | 250         | 1,199       |
| <i>PKD1</i> | 18          | 744           | 252         | 1,201       |
| <i>PKD1</i> | 19          | 743           | 253         | 1,198       |
| <i>PKD1</i> | 20          | 738           | 253         | 1,187       |
| <i>PKD1</i> | 21          | 713           | 244         | 1,155       |
| <i>PKD1</i> | 22          | 550           | 308         | 1,252       |
| <i>PKD1</i> | 23          | 564           | 312         | 1,349       |
| <i>PKD1</i> | 24          | 559           | 309         | 1,358       |
| <i>PKD1</i> | 25          | 555           | 304         | 1,361       |
| <i>PKD1</i> | 26          | 551           | 294         | 1,366       |
| <i>PKD1</i> | 27          | 548           | 281         | 1,432       |
| <i>PKD1</i> | 28          | 547           | 283         | 1,436       |
| <i>PKD1</i> | 29          | 544           | 279         | 1,442       |
| <i>PKD1</i> | 30          | 543           | 279         | 1,446       |
| <i>PKD1</i> | 31          | 544           | 275         | 1,525       |
| <i>PKD1</i> | 32          | 542           | 275         | 1,528       |
| <i>PKD1</i> | 33          | 532           | 269         | 1,521       |
| <i>PKD1</i> | 34          | 523           | 264         | 1,504       |
| <i>PKD1</i> | 35          | 59            | 24          | 138         |
| <i>PKD1</i> | 36          | 57            | 21          | 134         |
| <i>PKD1</i> | 37          | 56            | 22          | 133         |
| <i>PKD1</i> | 38          | 54            | 20          | 127         |
| <i>PKD1</i> | 39          | 53            | 21          | 125         |
| <i>PKD1</i> | 40          | 51            | 20          | 122         |
| <i>PKD1</i> | 41          | 51            | 20          | 118         |

|             |    |       |     |       |
|-------------|----|-------|-----|-------|
| <i>PKD1</i> | 42 | 51    | 19  | 115   |
| <i>PKD1</i> | 43 | 51    | 19  | 113   |
| <i>PKD1</i> | 44 | 51    | 19  | 110   |
| <i>PKD1</i> | 45 | 51    | 21  | 110   |
| <i>PKD1</i> | 46 | 49    | 19  | 108   |
| <hr/>       |    |       |     |       |
| <i>PKD2</i> | 1  | 71    | 43  | 111   |
| <i>PKD2</i> | 2  | 303   | 111 | 617   |
| <i>PKD2</i> | 3  | 1.097 | 388 | 1,509 |
| <i>PKD2</i> | 4  | 384   | 122 | 672   |
| <i>PKD2</i> | 5  | 833   | 270 | 1,249 |
| <i>PKD2</i> | 6  | 477   | 121 | 866   |
| <i>PKD2</i> | 7  | 452   | 190 | 984   |
| <i>PKD2</i> | 8  | 436   | 167 | 1,138 |
| <i>PKD2</i> | 9  | 295   | 49  | 572   |
| <i>PKD2</i> | 10 | 272   | 47  | 632   |
| <i>PKD2</i> | 11 | 514   | 137 | 766   |
| <i>PKD2</i> | 12 | 508   | 134 | 762   |
| <i>PKD2</i> | 13 | 491   | 130 | 748   |
| <i>PKD2</i> | 14 | 507   | 183 | 714   |
| <i>PKD2</i> | 15 | 510   | 188 | 711   |

**Supp. Table S5:** Details of variants identified by the Sanger sequencing or PacBio long-read sequencing approach.

| <i>c. notation**</i>             | <i>p. notation</i>            | <i>Chr.</i>  | <i>Pos.</i>      | <i># PB</i> | <i># S</i> | <i># O</i> | <i>PKDB*</i> | <i>dbSNP</i>               | <i>Note</i>                   |
|----------------------------------|-------------------------------|--------------|------------------|-------------|------------|------------|--------------|----------------------------|-------------------------------|
| <b>PKD1</b>                      |                               |              |                  |             |            |            |              |                            |                               |
| <i>c.12897C&gt;T</i>             | p.(=)                         | chr16        | 2,139,743        | 1           | 0          | 0          |              |                            | HC; D; Likely S FN            |
| <i>c.12890A&gt;G</i>             | p.(Lys4297Arg)                | chr16        | 2,139,750        | 1           | 0          | 0          |              | rs758833703                | HC; D; Likely S FN            |
| <i>c.12780T&gt;C</i>             | p.(=)                         | chr16        | 2,139,860        | 1           | 0          | 0          |              |                            | HC; D; Likely S FN            |
| <i>c.12630T&gt;C</i>             | p.(=)                         | chr16        | 2,140,010        | 8           | 8          | 7          | LN           | rs7203729 (C)              | HC; Likely PB FN; Likely S FN |
| <i>c.12409C&gt;T</i>             | p.(=)                         | chr16        | 2,140,321        | 3           | 3          | 3          | LN           | rs79899502 (C)             | HC                            |
| <i>c.12276A&gt;G</i>             | p.(=)                         | chr16        | 2,140,454        | 10          | 8          | 8          | LN           | rs3087632 (C)              | HC; Likely S FN               |
| <i>c.12182C&gt;T</i>             | p.(Ala4061Val)                | chr16        | 2,140,548        | 1           | 1          | 1          |              | rs372105572                | HC; Likely S FP               |
| <i>c.12176C&gt;T</i>             | p.(Ala4059Val)                | chr16        | 2,140,554        | 4           | 3          | 3          | LN           | rs3209986 (C)              | HC; Likely S FN               |
| <i>c.12133A&gt;G</i>             | p.(Ile4045Val)                | chr16        | 2,140,680        | 10          | 8          | 8          | LN           | rs10960 (C)                | HC; Likely S FN               |
| <i>c.11916C&gt;T</i>             | p.(=)                         | chr16        | 2,140,972        | 2           | 2          | 2          | LN           | rs77634115                 | HC                            |
| <i>c.11682C&gt;T</i>             | p.(=)                         | chr16        | 2,141,454        | 1           | 1          | 1          | LN           | rs567482892                | HC                            |
| <b><i>c.11554del</i></b>         | <b>p.(Leu3852TrpfsTer93)</b>  | <b>chr16</b> | <b>2,141,581</b> | <b>1</b>    | <b>1</b>   | <b>1</b>   | <b>DP</b>    | <b>rs724159823</b>         | <b>HC</b>                     |
| <b><i>c.11412-3C&gt;A</i></b>    | <b>p.?</b>                    | <b>chr16</b> | <b>2,141,910</b> | <b>1</b>    | <b>1</b>   | <b>1</b>   |              |                            | <b>HC</b>                     |
| <i>c.10768C&gt;T</i>             | p.(=)                         | chr16        | 2,143,865        | 2           | 2          | 2          | LN           | rs116114803                | HC                            |
| <i>c.10535C&gt;T</i>             | p.(Ala3512Val)                | chr16        | 2,144,176        | 3           | 3          | 3          | LN           | rs34197769 (C)             | HC                            |
| <i>c.9957C&gt;T</i>              | p.(=)                         | chr16        | 2,149,738        | 1           | 1          | 1          | LN           | rs141101590                | HC                            |
| <b><i>c.9397+1G&gt;A</i></b>     | <b>p.?</b>                    | <b>chr16</b> | <b>2,152,061</b> | <b>1</b>    | <b>1</b>   | <b>1</b>   | <b>DP</b>    |                            | <b>HC</b>                     |
| <i>c.9330T&gt;C</i>              | p.(=)                         | chr16        | 2,152,129        | 6           | 6          | 6          | LN           | rs12926160 rs144582212 (C) | HC                            |
| <b><i>c.9324del</i></b>          | <b>p.(Ile3109SerfsTer207)</b> | <b>chr16</b> | <b>2,152,134</b> | <b>1</b>    | <b>1</b>   | <b>1</b>   |              | <b>rs780284643</b>         | <b>HC</b>                     |
| <i>c.9195_9196delinsCC</i>       | p.(Phe3066Leu)                | chr16        | 2,152,387        | 5           | 5          | 5          | LN           | rs372874584                | HC                            |
| <i>c.9195G&gt;C</i>              | p.(=)                         | chr16        | 2,152,388        | 1           | 0          | 0          | LN           | rs9935834 (C)              | HC; D; Likely S FN            |
| <i>c.9187C&gt;T</i>              | p.(Arg3063Cys)                | chr16        | 2,152,396        | 1           | 1          | 1          | LN           | rs145906459                | HC                            |
| <b><i>c.9034_9039del</i></b>     | <b>p.(Thr3012_Ser3013del)</b> | <b>chr16</b> | <b>2,152,543</b> | <b>1</b>    | <b>1</b>   | <b>1</b>   |              |                            | <b>HC</b>                     |
| <b><i>c.8859dup</i></b>          | <b>p.(Glu2954Ter)</b>         | <b>chr16</b> | <b>2,152,903</b> | <b>1</b>    | <b>1</b>   | <b>1</b>   |              |                            | <b>HC</b>                     |
| <i>c.8440G&gt;A</i>              | p.(Gly2814Arg)                | chr16        | 2,153,618        | 1           | 1          | 1          | LN           | rs149151043                | HC                            |
| <b><i>c.8293C&gt;T</i></b>       | <b>p.(Arg2765Cys)</b>         | <b>chr16</b> | <b>2,153,765</b> | <b>1</b>    | <b>1</b>   | <b>1</b>   | <b>LH</b>    | <b>rs144979397</b>         | <b>HC</b>                     |
| <i>c.8161+8G&gt;A</i>            | p.?                           | chr16        | 2,154,491        | 1           | 1          | 1          | LN           | rs199569003                | HC                            |
| <i>c.8123C&gt;T</i>              | p.(Thr2708Met)                | chr16        | 2,154,537        | 1           | 1          | 1          | LN           | rs147350387                | HC                            |
| <i>c.8020C&gt;T</i>              | p.(Pro2674Ser)                | chr16        | 2,154,640        | 1           | 1          | 1          | LN           | rs144557371                | HC                            |
| <b><i>c.8017-2_8017-1del</i></b> | <b>p.?</b>                    | <b>chr16</b> | <b>2,154,643</b> | <b>1</b>    | <b>1</b>   | <b>1</b>   | <b>DP</b>    |                            | <b>HC</b>                     |

|                                  |                               |              |                  |          |          |          |           |                    |                                               |
|----------------------------------|-------------------------------|--------------|------------------|----------|----------|----------|-----------|--------------------|-----------------------------------------------|
| <i>c.7940C&gt;T</i>              | <b>p.(Thr2647Met)</b>         | <b>chr16</b> | <b>2,155,399</b> | <b>1</b> | <b>1</b> | <b>1</b> |           | <b>rs748496650</b> | <b>HC</b>                                     |
| <i>c.7913A&gt;G</i>              | p.(His2638Arg)                | chr16        | 2,155,426        | 5        | 5        | 5        | LN        | rs9936785 (C)      | HC                                            |
| <i>c.7708T&gt;C</i>              | p.(=)                         | chr16        | 2,156,021        | 5        | 5        | 5        | LN        | rs28575767 (C)     | HC                                            |
| <i>c.7441C&gt;T</i>              | p.(=)                         | chr16        | 2,156,447        | 7        | 7        | 7        | LN        | rs2003782 (C)      | HC                                            |
| <b><i>c.7214G&gt;T</i></b>       | <b>p.(Trp2405Leu)</b>         | <b>chr16</b> | <b>2,156,674</b> | <b>1</b> | <b>1</b> | <b>1</b> |           |                    | <b>HC</b>                                     |
| <i>c.7165T&gt;C</i>              | p.(=)                         | chr16        | 2,156,850        | 7        | 7        | 7        | LN        | rs2457533 (C)      | HC                                            |
| <b><i>c.6994_7000dup</i></b>     | <b>p.(Ala2332GlyfsTer90)</b>  | <b>chr16</b> | <b>2,157,954</b> | <b>1</b> | <b>1</b> | <b>1</b> | <b>DP</b> |                    | <b>HC</b>                                     |
| <i>c.6986G&gt;A</i>              | p.(Arg2329Gln)                | chr16        | 2,157,963        | 1        | 1        | 1        | LN        | rs575211353        | HC                                            |
| <i>c.6670_6673del</i>            | p.(Pro2224TrpfsTer17)         | chr16        | 2,158,494        | 1        | 0        | 0        |           |                    | Likely LAA Low Confidence Assembly            |
| <b><i>c.6657_6671del</i></b>     | <b>p.(Arg2220_Pro2224del)</b> | <b>chr16</b> | <b>2,158,496</b> | <b>1</b> | <b>1</b> | <b>1</b> |           |                    | <b>HC; Complete PB LAA Confident Assembly</b> |
| <i>c.6666_6667del</i>            | p.(Leu2223AlafsTer38)         | chr16        | 2,158,500        | 1        | 0        | 0        |           |                    | Likely LAA Low Confidence Assembly            |
| <i>c.6656_6659del</i>            | p.(Pro2219ArgfsTer22)         | chr16        | 2,158,508        | 1        | 0        | 0        |           |                    | Likely LAA Low Confidence Assembly            |
| <i>c.6488G&gt;A</i>              | p.(Arg2163Gln)                | chr16        | 2,158,680        | 1        | 0        | 0        | LN        | rs145217118        | HC; D; Likely S FN                            |
| <b><i>c.6223_6224insTT</i></b>   | <b>p.(Arg2075LeufsTer42)</b>  | <b>chr16</b> | <b>2,158,944</b> | <b>0</b> | <b>1</b> | <b>0</b> |           |                    | <b>Likely PB FN</b>                           |
| <i>c.5763G&gt;A</i>              | p.(=)                         | chr16        | 2,159,405        | 2        | 2        | 2        | LN        | rs2575313 (C)      | HC                                            |
| <i>c.5172C&gt;T</i>              | p.(=)                         | chr16        | 2,159,996        | 7        | 7        | 7        | LN        | rs9935526 (C)      | HC                                            |
| <b><i>c.4968_4969delinsC</i></b> | <b>p.(Arg1657GlyfsTer65)</b>  | <b>chr16</b> | <b>2,160,198</b> | <b>1</b> | <b>1</b> | <b>1</b> |           |                    | <b>HC</b>                                     |
| <i>c.4968T&gt;C</i>              | p.(=)                         | chr16        | 2,160,200        | 1        | 0        | 0        |           | rs777909326        | HC; D; Likely S FN                            |
| <i>c.4917C&gt;T</i>              | p.(=)                         | chr16        | 2,160,251        | 1        | 1        | 1        | LN        | rs148852027        | HC                                            |
| <i>c.4674G&gt;A</i>              | p.(=)                         | chr16        | 2,160,494        | 1        | 1        | 1        | LN        | rs79884128 (C)     | HC                                            |
| <i>c.4665A&gt;C</i>              | p.(=)                         | chr16        | 2,160,503        | 1        | 7        | 1        | LN        | rs71385734 (C)     | HC; D; Likely S FP                            |
| <i>c.4475G&gt;C</i>              | p.(Arg1492Pro)                | chr16        | 2,160,693        | 1        | 1        | 1        |           |                    | HC                                            |
| <b><i>c.4248dup</i></b>          | <b>p.(Gly1417TrpfsTer14)</b>  | <b>chr16</b> | <b>2,160,919</b> | <b>1</b> | <b>1</b> | <b>1</b> |           |                    | <b>HC</b>                                     |
| <i>c.4195T&gt;C</i>              | p.(Trp1399Arg)                | chr16        | 2,160,973        | 5        | 5        | 5        | LN        | rs116092985 (C)    | HC                                            |
| <i>c.3643C&gt;G</i>              | p.(Leu1215Val)                | chr16        | 2,161,525        | 1        | 1        | 1        |           | rs144338515        | HC                                            |
| <i>c.3513C&gt;G</i>              | p.(=)                         | chr16        | 2,161,655        | 1        | 1        | 1        | LN        | rs143784787        | HC                                            |
| <i>c.3375C&gt;T</i>              | p.(=)                         | chr16        | 2,161,793        | 5        | 5        | 5        | LN        | rs74331768 (C)     | HC                                            |
| <i>c.3372C&gt;T</i>              | p.(=)                         | chr16        | 2,161,796        | 5        | 5        | 5        | LN        | rs75510884 (C)     | HC                                            |
| <i>c.3275T&gt;C</i>              | p.(Met1092Thr)                | chr16        | 2,162,361        | 5        | 5        | 5        | LN        | rs2549677 (C)      | HC                                            |
| <i>c.3111A&gt;G</i>              | p.(=)                         | chr16        | 2,162,839        | 3        | 3        | 3        | LN        | rs2099534 (C)      | HC                                            |
| <i>c.3100A&gt;G</i>              | p.(Asn1034Asp)                | chr16        | 2,162,850        | 1        | 1        | 1        |           | rs369180760        | HC                                            |
| <i>c.3063T&gt;C</i>              | p.(=)                         | chr16        | 2,162,887        | 5        | 5        | 5        | LN        | rs2369068 (C)      | HC                                            |
| <i>c.2730C&gt;T</i>              | p.(=)                         | chr16        | 2,164,294        | 2        | 2        | 2        | LN        | rs35965348 (C)     | HC                                            |
| <i>c.2700G&gt;A</i>              | p.(=)                         | chr16        | 2,164,324        | 2        | 2        | 2        | LN        | rs35667726 (C)     | HC                                            |
| <i>c.2694A&gt;C</i>              | p.(=)                         | chr16        | 2,164,330        | 2        | 2        | 2        | LN        | rs142357713        | HC                                            |
| <b><i>c.2681_2690del</i></b>     | <b>p.(Phe894Ter)</b>          | <b>chr16</b> | <b>2,164,333</b> | <b>1</b> | <b>1</b> | <b>1</b> |           |                    | <b>HC</b>                                     |



|                     |                             |              |                  |          |          |          |            |                    |                    |
|---------------------|-----------------------------|--------------|------------------|----------|----------|----------|------------|--------------------|--------------------|
| <b>c.2269del</b>    | <b>p.(Gln757SerfsTer28)</b> | <b>chr16</b> | <b>2,164,754</b> | <b>1</b> | <b>1</b> | <b>1</b> |            | <b>rs775710328</b> | <b>HC</b>          |
| c.2109C>T           | p.(=)                       | chr16        | 2,164,915        | 1        | 1        | 1        | LN         | rs527655141        | HC                 |
| c.1850-4A>G         | p.?                         | chr16        | 2,165,630        | 7        | 7        | 7        | LN         | rs35929659 (C)     | HC                 |
| c.1602C>T           | p.(=)                       | chr16        | 2,166,838        | 1        | 1        | 1        | LN         | rs759092782        | HC                 |
| <b>c.1286G&gt;T</b> | <b>p.(Trp429Leu)</b>        | <b>chr16</b> | <b>2,167,589</b> | <b>1</b> | <b>1</b> | <b>1</b> | <b>HLP</b> |                    | <b>HC</b>          |
| <b>c.1261C&gt;T</b> | <b>p.(Arg421Cys)</b>        | <b>chr16</b> | <b>2,167,614</b> | <b>1</b> | <b>1</b> | <b>1</b> |            |                    | <b>HC</b>          |
| c.182C>T            | p.(Pro61Leu)                | chr16        | 2,185,509        | 1        | 0        | 0        | LN         |                    | HC; D; Likely S FN |
| c.129C>T            | p.(=)                       | chr16        | 2,185,562        | 1        | 0        | 0        |            |                    | HC; D; Likely S FN |
| c.122C>T            | p.(Pro41Leu)                | chr16        | 2,185,569        | 2        | 0        | 0        |            |                    | HC; D; Likely S FN |
| c.96C>T             | p.(=)                       | chr16        | 2,185,595        | 1        | 0        | 0        |            |                    | HC; D; Likely S FN |

### PKD2

|           |               |      |            |    |   |   |    |                 |                 |
|-----------|---------------|------|------------|----|---|---|----|-----------------|-----------------|
| c.53C>T   | p.(Pro18Leu)  | chr4 | 88,928,938 | 1  | 0 | 0 |    |                 | D; Likely S FN  |
| c.83G>C   | p.(Arg28Pro)  | chr4 | 88,928,968 | 11 | 9 | 9 | LN | rs1805044 (C)   | HC; Likely S FN |
| c.361G>T  | p.(Gly121Cys) | chr4 | 88,929,246 | 1  | 1 | 1 |    | rs371898195     | HC              |
| c.420G>A  | p.(=)         | chr4 | 88,929,305 | 5  | 5 | 5 | LN | rs2728118 (C)   | HC              |
| c.568G>A  | p.(Ala190Thr) | chr4 | 88,929,453 | 1  | 1 | 1 | LN | rs117078377 (C) | HC              |
| c.720C>G  | p.(=)         | chr4 | 88,957,382 | 0  | 2 | 0 |    |                 | D; Likely S FP  |
| c.1459T>C | p.(Tyr487His) | chr4 | 88,967,933 | 1  | 1 | 1 | LN | rs201328200     | HC              |

\* **Bold**=Pathogenic; **DP**=Definitely Pathogenic; **HLP**=Highly Likely Pathogenic; **LH**=Likely Hypomorphic; **LN**=Likely Neutral; **C**=Common; **HC**=High-Confident; **FP**=False Positive; **FN**=False Negative; **D**=Discordant; **PB**=PacBio; **S**=Sanger; **O**=Overlap.

+ Deletion-insertions were manually inspected and HGVS description modified to avoid variant redundancies or undesired complex descriptions by clustering of neighbouring variants (e.g. c.9195\_9196delinsCC and c.6994\_7000dup). Individual substitutions c.9195G>C and/or c9196T>C from the polymorphic site c.9195\_9196delinsCC were removed as redundant variants if c.9195\_9196delinsCC was identified as well in the same patient. The pathogenic duplication c.6994\_7000dup was originally detected as c.6982\_6983delinsAGCGGCTG when reconstructing the PKD1 allelic sequence and was split into two independent descriptions c.6994\_7000dup, and c.6982del.

\*\* The 177 coding or splice site variants listed in this table were either reported by Sanger sequencing or detected by our direct long-read sequencing approach in at least one patient within the cohort of 19 screened ADPKD patients. 157 variants are high-confidence variants identified on the same set of patients by both approaches. 8 Sanger variants were not confirmed by PacBio, from which 6 had low sequencing data support. The remaining 20 variants were solely detected by PacBio from which 3 are low-confident variants called by the reconstructions of allelic sequences of c.6657\_6671del.

\*\* RefSeq NM\_001009944.2 or NM\_000297.3 for PKD1 and PKD2, respectively.

**Supp. Table S6:** Amplified LR-PCR primer sequences for Sanger sequencing.

| Exons covered | Fragment size (Kb) | Strand* | LR-PCR Primer sequence (5'-3')** |
|---------------|--------------------|---------|----------------------------------|
| <i>1</i>      | 2.2                | FW      | CGCAGCCTTACCATCCACCT             |
|               |                    | RV      | TCATCGCCCCTTCCTAAGCA             |
| <i>2-13</i>   | 7.9                | FW      | CCGAGTAGCTGGAACACTACAGTTACACACT  |
|               |                    | RV      | CACCCAGTTACCTCCCAACAGAC          |
| <i>14-21</i>  | 7.6                | FW      | GTTTCCCTGTCTGTGTGGGAGGTAAC       |
|               |                    | RV      | CTGCGTTCACACAGGACAGAACG          |
| <i>22-34</i>  | 7.5                | FW      | CCGTGTAGAGAGGAGGGCGTGTGCAAGGA    |
|               |                    | RV      | TCGGCAAGGACCTGCTGGATCAG          |

\*FW, forward strand; RV, reverse strand.

\*\*Primers included a 5' M13-tail (TGTAACGACGGCCAGT for FW primers, and CAGGAAACAGCTATGACC for RV primers).

**Supp. Table S7:** Nested PCR primer sequences for *PKDI* Sanger sequencing.

| <b>Exons covered</b>   | <b>Size (bp)</b> | <b>Strand*</b> | <b>Nested PCR Primer sequences (5'-3'）**</b> |
|------------------------|------------------|----------------|----------------------------------------------|
| 1 ( <i>frag. 1</i> )   | 256              | FW             | CCTGAGCTGCGGCCTCCG                           |
|                        |                  | RV             | CAGTTGACGCGGCAGGCG                           |
| 1 ( <i>frag. 2</i> )   | 216              | FW             | TGCGAGCCCCCTGCCTC                            |
|                        |                  | RV             | AA <del>CC</del> CGCCACGCCCGCCGTC            |
| 2-3                    | 340              | FW             | TAGGGGCTCTGGCCCTGAC                          |
|                        |                  | RV             | CCAGCCAGGACCCACCCAAAG                        |
| 4                      | 266              | FW             | CATAGACCCTCCACCAG                            |
|                        |                  | RV             | CCTGGCTGGGAAGGACAGA                          |
| 5 ( <i>frag. 1</i> )   | 389              | FW             | TGGAGCCAGGAGGAGCAGAA                         |
|                        |                  | RV             | CAGAGGGACAGGCAGGCAAA                         |
| 5 ( <i>frag. 2</i> )   | 431              | FW             | AGCCCTCCAGTGCCTCCTT                          |
|                        |                  | RV             | GCACGGCCGTACGTGATAG                          |
| 6                      | 280              | FW             | ACCGTTGACACCCTCGTTC                          |
|                        |                  | RV             | CTCTGCCCAAGTCTCAG                            |
| 7                      | 329              | FW             | CTGTGAGGGTGGGAGGATGG                         |
|                        |                  | RV             | CTAACCACAGCCAGCGTCTC                         |
| 8                      | 226              | FW             | GCGGCTCGGTCCCCAGTCT                          |
|                        |                  | RV             | GGAGGGCAGGTTGTAGAACGTG                       |
| 9 ( <i>frag. 1</i> )   | 295              | FW             | GGAGTCTGGGCTTCAGGCTG                         |
|                        |                  | RV             | CTGGGAACCACTCTGGTGGC                         |
| 9 ( <i>frag. 2</i> )   | 228              | FW             | GGAGTCTGGGCTTCAGGCTG                         |
|                        |                  | RV             | CACCCACCACCCAGAGTCCC                         |
| 10 ( <i>frag. 1</i> )  | 184              | FW             | GGCCTGTGGGCAAAATCAGGG                        |
|                        |                  | RV             | TGGGGGTGGCAGGAGGCGTC                         |
| 10 ( <i>frag. 2</i> )  | 201              | FW             | AGGGGGACGCTGGTGCCCTG                         |
|                        |                  | RV             | GGGAACAGACCCAGGTCAGG                         |
| 11 ( <i>frag. 1</i> )  | 425              | FW             | GTCCACGGGCCATGACCG                           |
|                        |                  | RV             | CCAGCCACTGGGGAGACCAC                         |
| 11 ( <i>frag. 2</i> )  | 257              | FW             | GGCAGAGGTGGGC AATGG                          |
|                        |                  | RV             | AGCCGGGCACGAAGGTGGC                          |
| 11 ( <i>frag. 3</i> )  | 326              | FW             | GTGTCAGCGCCCGCTTTG                           |
|                        |                  | RV             | CTGTGTGAGCACCTGTCTGC                         |
| 12                     | 241              | FW             | GTGTGTCCAGGAGGCGA                            |
|                        |                  | RV             | AGAGGTGAAGGTGGAGC                            |
| 13                     | 244              | FW             | CTGCCACCTGGGCTCACTG                          |
|                        |                  | RV             | TGCCACCCCAAACCGGC                            |
| 14                     | 198              | FW             | CTCACTGCGTCCCACCGC                           |
|                        |                  | RV             | CTGAAAGGCAGTGGCCCC                           |
| 15 ( <i>frag. 1</i> )  | 382              | FW             | TGGGGAGCAGGTGGGGGTGC                         |
|                        |                  | RV             | AGACGCGCACATCCGCTGGGCCG                      |
| 15 ( <i>frag. 2</i> )  | 363              | FW             | CGTGCGCCTGGAGGTCAAC                          |
|                        |                  | RV             | GGCTGCGTGGGGATGCAG                           |
| 15 ( <i>frag. 3</i> )  | 373              | FW             | CGTGCTGGTCTTCGTCCTGG                         |
|                        |                  | RV             | TGTAGCGTAGGGGAACGG                           |
| 15 ( <i>frag. 4</i> )  | 380              | FW             | GTTTGTGCAGCTCGGGGAC                          |
|                        |                  | RV             | AAGCGTGGGTACCTCCG                            |
| 15 ( <i>frag. 5</i> )  | 376              | FW             | CCCGCCAGCTACCTGTGG                           |
|                        |                  | RV             | GCGGAGCCACCTCGTTC                            |
| 15 ( <i>frag. 6</i> )  | 378              | FW             | CTTCCGCTCCGTGGGCAC                           |
|                        |                  | RV             | GGAGGCGGCCACCATCAG                           |
| 15 ( <i>frag. 7</i> )  | 374              | FW             | AGCGCCTGGGCGGACTGCAC                         |
|                        |                  | RV             | AGCTGCCCCAAAAGGGC                            |
| 15 ( <i>frag. 8</i> )  | 363              | FW             | GAGCCCGAGGCAGCTTC                            |
|                        |                  | RV             | GGGAGCACCTCGGGGTTG                           |
| 15 ( <i>frag. 9</i> )  | 377              | FW             | AGCTGTCACCTTCCGCCTG                          |
|                        |                  | RV             | GCACCTGGATCTCCAACAGCC                        |
| 15 ( <i>frag. 10</i> ) | 340              | FW             | GCTGGTACCTGTCCGGC                            |
|                        |                  | RV             | CACCAGGTTGGAGGCGTTC                          |
| 15 ( <i>frag. 11</i> ) | 567              | FW             | CCAGGGCCGAGACTCCTAC                          |
|                        |                  | RV             | TGGGGTCTGACTCGCTC                            |
| 15 ( <i>frag. 12</i> ) | 196              | FW             | CGCCTGGTCCCCATCATTG                          |
|                        |                  | RV             | GGACGGGTGAGGGGCATG                           |
| 16                     | 230              | FW             | AGGCCACGTCGCCCTTG                            |
|                        |                  | RV             | GAGGCTGGGCTGTCCAAGG                          |
| 17                     | 203              | FW             | GAGGTAACCCCACTCCCACG                         |

|              |     |    |                          |
|--------------|-----|----|--------------------------|
|              |     | RV | ATCCCCAGCCCGCCACAC       |
| 18           | 353 | FW | AGAGGGTTGCGCCCCCTC       |
|              |     | RV | ATCCCGTGCTCCCCCACGC AGG  |
| 19           | 286 | FW | TCCCGTGATGCCGTGGGG       |
|              |     | RV | CAGGTGGCAGTCTCGGGG       |
| 20           | 260 | FW | CCACCTGCTCACCACCCC       |
|              |     | RV | GCAGGGGTACAGGTCTTGGTC CC |
| 21           | 226 | FW | GCGCTGCTGACAGTTGC        |
|              |     | RV | ATGCGGGGCAGGGTGAGC       |
| 22           | 220 | FW | AGTGGGGCCAGGAGCGGG       |
|              |     | RV | GGGCGGGTGGCATGGGGC       |
| 23 (frag. 1) | 349 | FW | CCCTCCCTCTACCTCCCTGTC    |
|              |     | RV | CACTGAGGTGGCCAGGGC       |
| 23 (frag. 2) | 431 | FW | GGGCCTGGCTGCCACTTC       |
|              |     | RV | AAGGCCAGGGGGCCGCGTG      |
| 24           | 222 | FW | CAGGCGTGTACCTGCGC        |
|              |     | RV | TGCCCTGCCCTGCCAGGCTG     |
| 25           | 313 | FW | CTGGGCTCACGTCCGCTAC      |
|              |     | RV | GCTCCCAGGAGCACAGGGTC     |
| 26           | 289 | FW | GAGAAGGCACAGTTGCACG      |
|              |     | RV | AGAGCAGGGGAGGCCCTG       |
| 27           | 240 | FW | GCAGACCGAGCCTCCAC        |
|              |     | RV | AGGGGCAGAGCTTGGCAG       |
| 28           | 217 | FW | TGCGAGCCTGACCTCCCTC      |
|              |     | RV | CCAACCTCCCACGGAGTGG      |
| 29           | 316 | FW | TTGGGCAGGGTGGTCCTG       |
|              |     | RV | GGAAGGGCTGGGCAGGAAG      |
| 30           | 202 | FW | CAGCCTCACCTGTGTGGCC      |
|              |     | RV | TCCATTCCCAGTACTCCCGG     |
| 31-32        | 338 | FW | GAGCAGGTCTGAGCTGCCG      |
|              |     | RV | GCACCAGGGCTCGAGGTTTC     |
| 33-34        | 473 | FW | GGTGGGCTGTGTGTGTGAC      |
|              |     | RV | CCCCTCCTCTGGCAATCC       |
| 35-36        | 576 | FW | CAGGTTAACATGGGCTTGG      |
|              |     | RV | GAGGGGTGGCTTCAGAG        |
| 37           | 341 | FW | GGTAGGCTACAGGCCTCCAT     |
|              |     | RV | GAGGTGGGAGACAAGAGACG     |
| 38           | 304 | FW | AAAGCCCTGCTGTCACTGTGG    |
|              |     | RV | TAGGGTCTGGCTGGACTAAAG    |
| 39           | 301 | FW | GGGTCTCTGGTGGCCGCTCAC    |
|              |     | RV | ATGCCAGAGCTCCGCTAAAGG    |
| 40-41        | 565 | FW | GCAGGAAACACTCCTGTTGG     |
|              |     | RV | GCTCCTGGCTGGTGACTG       |
| 42           | 608 | FW | GAGCCACCCTCACTCCTC       |
|              |     | RV | AACAGCAGCAGGCACACCT      |
| 43           | 660 | FW | CTCTGCTCACCTCGGTACG      |
|              |     | RV | CGGACGAGAAATCTGTCTGC     |
| 44           | 361 | FW | CGCCGTTCACTAGCTTCGAC     |
|              |     | RV | AGTCCCAGGGCACAGCACAA     |
| 45           | 486 | FW | GGGAGGGGCTCTAGCTC        |
|              |     | RV | CACAGGGGCTCAGTCAGTC      |
| 46           | 680 | FW | CAAGGTCAAGGAGGTGGGTA     |
|              |     | RV | TTGACAGCGGCAGAAAGTAA     |

<sup>a</sup>FW, forward strand; RV, reverse strand.

<sup>\*\*</sup>Primers included a 5' M13-tail (TGTAACGACGGCCAGT for FW primers, and CAGGAAACAGCTATGACC for RV primers).

**Supp. Table S8:** Nested PCR primer sequences for *PKD2* Sanger sequencing.

| Exon covered         | Size (bp) | Strand* | Oligo sequence (5'-3')**   |
|----------------------|-----------|---------|----------------------------|
| 1 ( <i>frag. 1</i> ) | 421       | FW      | GAAAGGAACATGGCTCCTGA       |
|                      |           | RV      | ACCTCCTCCTCCTCCTCCTC       |
| 1 ( <i>frag. 2</i> ) | 454       | FW      | CCCTTCTCCTCCGCTCTC         |
|                      |           | RV      | CGTCTGGTTCGTGCATCT         |
| 02                   | 320       | FW      | GTGCTTTATTTCCCTTTTG        |
|                      |           | RV      | GGTGCATACACACTTCCTTT       |
| 03                   | 330       | FW      | CTTTGTGAAGGCTGCTGGT        |
|                      |           | RV      | TCCTGTCGATACTCATGCATTG     |
| 04                   | 435       | FW      | TTGGTTATGCAAACGATG         |
|                      |           | RV      | GAATGGTGGGAGTTCAGAG        |
| 05                   | 414       | FW      | CCTCAAGTGTCCACTGATT        |
|                      |           | RV      | GTAGCTAACTGCAGGCAAAG       |
| 06                   | 401       | FW      | CTGGCTGTATTCATGTGTTG       |
|                      |           | RV      | AATGCTGAGGAGATCAAAGA       |
| 07                   | 336       | FW      | GGTAAGTTTCATATTTCTAAAACACT |
|                      |           | RV      | TTCCATGATTTTGTGGAAC        |
| 08                   | 329       | FW      | CACACCATTTGTTTATCCA        |
|                      |           | RV      | TTCTTGAGAAGCAGTGACAA       |
| 09                   | 277       | FW      | TGCATCAACTAGTGGACATT       |
|                      |           | RV      | GAGAAGACAAGGATTTACGAAG     |
| 10                   | 259       | FW      | TTCCAAATTAATGTTTCTCCTT     |
|                      |           | RV      | AAAAATCTGGGTGAAACAATG      |
| 11                   | 278       | FW      | AAAACAGATGCAAAAGGAGA       |
|                      |           | RV      | CCAGGAATTTATCTTTAGAAGC     |
| 12                   | 266       | FW      | GAACTGGGTACAAGGAATGA       |
|                      |           | RV      | TTTGATACATCTGTGGTGTG       |
| 13                   | 322       | FW      | GTCCTTGGTGAGGCTTCT         |
|                      |           | RV      | CTGGTCTCATGTGGACTCTT       |
| 14                   | 285       | FW      | AAAGACAATGACAAGCACTTT      |
|                      |           | RV      | TCATTAATAACACCATGCTCA      |
| 15                   | 417       | FW      | ATTATTTGGTCCCTGGACTT       |
|                      |           | RV      | GTGCTTGTTACAGCAATTCA       |

\*FW, forward strand; RV, reverse strand.

\*\*Primers included a 5' M13-tail (TGTA AACGACGGCCAGT for FW, and CAGGAAACAGCTATGACC for RV).

**Supp. Table S9:** Discordant variant calls between Sanger sequencing and PacBio long-read sequencing approach.

| <i>c. notation</i>             | <i>p. notation</i>           | <i>Chr</i>   | <i>pos</i>       | <i># PB</i> | <i># S</i> | <i># O</i> | <i>PKDB*</i> | <i>dbSNP</i>   | <i>Note</i>                        |
|--------------------------------|------------------------------|--------------|------------------|-------------|------------|------------|--------------|----------------|------------------------------------|
| <b>PKD1</b>                    |                              |              |                  |             |            |            |              |                |                                    |
| <i>c.12897C&gt;T</i>           | p.(=)                        | chr16        | 2,139,743        | 1           | 0          | 0          |              |                | HC; D; Likely S FN                 |
| <i>c.12890A&gt;G</i>           | p.(Lys4297Arg)               | chr16        | 2,139,750        | 1           | 0          | 0          |              | rs758833703    | HC; D; Likely S FN                 |
| <i>c.12780T&gt;C</i>           | p.(=)                        | chr16        | 2,139,860        | 1           | 0          | 0          |              |                | HC; D; Likely S FN                 |
| <i>c.12630T&gt;C</i>           | p.(=)                        | chr16        | 2,140,010        | 8           | 8          | 7          | LN           | rs7203729 (C)  | HC; Likely PB FN; Likely S FN      |
| <i>c.12276A&gt;G</i>           | p.(=)                        | chr16        | 2,140,454        | 10          | 8          | 8          | LN           | rs3087632 (C)  | HC; Likely S FN                    |
| <i>c.12176C&gt;T</i>           | p.(Ala4059Val)               | chr16        | 2,140,554        | 4           | 3          | 3          | LN           | rs3209986 (C)  | HC; Likely S FN                    |
| <i>c.12133A&gt;G</i>           | p.(Ile4045Val)               | chr16        | 2,140,680        | 10          | 8          | 8          | LN           | rs10960 (C)    | HC; Likely S FN                    |
| <i>c.9195G&gt;C</i>            | p.(=)                        | chr16        | 2,152,388        | 1           | 0          | 0          | LN           | rs9935834 (C)  | HC; D; Likely S FN                 |
| <i>c.6670_6673del</i>          | p.(Pro2224TrpfsTer17)        | chr16        | 2,158,494        | 1           | 0          | 0          |              |                | Likely LAA Low Confidence Assembly |
| <i>c.6666_6667del</i>          | p.(Leu2223AlafsTer38)        | chr16        | 2,158,500        | 1           | 0          | 0          |              |                | Likely LAA Low Confidence Assembly |
| <i>c.6656_6659del</i>          | p.(Pro2219ArgfsTer22)        | chr16        | 2,158,508        | 1           | 0          | 0          |              |                | Likely LAA Low Confidence Assembly |
| <i>c.6488G&gt;A</i>            | p.(Arg2163Gln)               | chr16        | 2,158,680        | 1           | 0          | 0          | LN           | rs145217118    | HC; D; Likely S FN                 |
| <b><i>c.6223_6224insTT</i></b> | <b>p.(Arg2075LeufsTer42)</b> | <b>chr16</b> | <b>2,158,944</b> | <b>0</b>    | <b>1</b>   | <b>0</b>   |              |                | <b>Likely PB FN</b>                |
| <i>c.4968T&gt;C</i>            | p.(=)                        | chr16        | 2,160,200        | 1           | 0          | 0          |              | rs777909326    | HC; D; Likely S FN                 |
| <i>c.4665A&gt;C</i>            | p.(=)                        | chr16        | 2,160,503        | 1           | 7          | 1          | LN           | rs71385734 (C) | HC; D                              |
| <i>c.182C&gt;T</i>             | p.(Pro61Leu)                 | chr16        | 2,185,509        | 1           | 0          | 0          | LN           |                | HC; D; Likely S FN                 |
| <i>c.129C&gt;T</i>             | p.(=)                        | chr16        | 2,185,562        | 1           | 0          | 0          |              |                | HC; D; Likely S FN                 |
| <i>c.122C&gt;T</i>             | p.(Pro41Leu)                 | chr16        | 2,185,569        | 2           | 0          | 0          |              |                | HC; D; Likely S FN                 |
| <i>c.96C&gt;T</i>              | p.(=)                        | chr16        | 2,185,595        | 1           | 0          | 0          |              |                | HC; D; Likely S FN                 |
| <b>PKD2</b>                    |                              |              |                  |             |            |            |              |                |                                    |
| <i>c.53C&gt;T</i>              | p.(Pro18Leu)                 | chr4         | 88,928,938       | 1           | 0          | 0          |              |                | D; Likely S FN                     |
| <i>c.83G&gt;C</i>              | p.(Arg28Pro)                 | chr4         | 88,928,968       | 11          | 9          | 9          | LN           | rs1805044 (C)  | HC; Likely S FN                    |
| <i>c.720C&gt;G</i>             | p.(=)                        | chr4         | 88,957,382       | 0           | 2          | 0          |              |                | D; Likely S FP                     |

\* *Bold*=Pathogenic; *LN*=Likely Neutral; *C*=Common; *HC*=High-Confident; *FP*=False Positive; *FN*=False Negative; *D*=Discordant; *PB*=PacBio; *S*=Sanger; *O*=Overlap.

\*\* *RefSeq* NM\_001009944.2 or NM\_000297.3 for PKD1 and PKD2, respectively.

† *Discordances* shown in this table are represented in Supp. Figure S2B as yellow dots for likely S FP variants, red dots for likely PB FN variants, and grey dots for Likely S FN.

**Supp. Table S10: Variants detected in homopolymer stretches using long-read sequencing approach.**

| <i>c. notation**</i> | <i>p. notation</i>     | <i>Chr</i> | <i>pos</i> | <i># PB</i> | <i># S</i> | <i># O</i> | <i>PKDB*</i> | <i>dbSNP</i>              | <i>Note</i>            |
|----------------------|------------------------|------------|------------|-------------|------------|------------|--------------|---------------------------|------------------------|
| <b>PKD1</b>          |                        |            |            |             |            |            |              |                           |                        |
| <i>c.12530del</i>    | p.(Pro4177HisfsTer21)  | chr16      | 2,140,109  | 3           | 0          | 0          |              | rs767438361               | HS; Likely PB Artifact |
| <i>c.12518del</i>    | p.(Pro4173ArgfsTer25)  | chr16      | 2,140,121  | 5           | 0          | 0          |              | rs778397103               | HS; Likely PB Artifact |
| <i>c.12445-3del</i>  | p.?                    | chr16      | 2,140,197  | 5           | 0          | 0          |              | rs770813339               | HS; Likely PB Artifact |
| <i>c.12139-5del</i>  | p.?                    | chr16      | 2,140,595  | 2           | 0          | 0          | LN           | rs146430229               | HS; Likely PB Artifact |
| <i>c.12085del</i>    | p.(Val4029SerfsTer10)  | chr16      | 2,140,727  | 1           | 0          | 0          |              | rs781278135               | HS; Likely PB Artifact |
| <i>c.11713-5del</i>  | p.?                    | chr16      | 2,141,179  | 8           | 0          | 0          |              |                           | HS; Likely PB Artifact |
| <i>c.11240del</i>    | p.(Pro3747HisfsTer79)  | chr16      | 2,142,509  | 6           | 0          | 0          |              |                           | HS; Likely PB Artifact |
| <i>c.10948del</i>    | p.(His3650ThrfsTer34)  | chr16      | 2,143,612  | 1           | 0          | 0          |              |                           | HS; Likely PB Artifact |
| <i>c.10822-8del</i>  | p.?                    | chr16      | 2,143,746  | 12          | 0          | 0          | LN           | rs373684171 rs9924796 (C) | HS; Likely PB Artifact |
| <i>c.10745del</i>    | p.(Pro3582ArgfsTer3)   | chr16      | 2,143,887  | 11          | 0          | 0          | DP           | CD076868                  | HS; Likely PB Artifact |
| <i>c.9518del</i>     | p.(Pro3173ArgfsTer143) | chr16      | 2,150,446  | 1           | 0          | 0          |              | rs772608027               | HS; Likely PB Artifact |
| <i>c.9176del</i>     | p.(Pro3059GlnfsTer15)  | chr16      | 2,152,406  | 10          | 0          | 0          |              | rs759773922               | HS; Likely PB Artifact |
| <i>c.9097del</i>     | p.(Leu3033TrpfsTer41)  | chr16      | 2,152,485  | 1           | 0          | 0          |              |                           | HS; Likely PB Artifact |
| <i>c.8586del</i>     | p.(Ile2863SerfsTer12)  | chr16      | 2,153,471  | 1           | 0          | 0          | DP           |                           | HS; Likely PB Artifact |
| <i>c.8427del</i>     | p.(Glu2810ArgfsTer65)  | chr16      | 2,153,630  | 1           | 0          | 0          |              | rs746703342               | HS; Likely PB Artifact |
| <i>c.8019del</i>     | p.(Ser2675AlafsTer10)  | chr16      | 2,154,640  | 1           | 0          | 0          |              |                           | HS; Likely PB Artifact |
| <i>c.7864-3del</i>   | p.?                    | chr16      | 2,155,477  | 1           | 0          | 0          |              | rs756848270               | HS; Likely PB Artifact |
| <i>c.7622del</i>     | p.(Pro2541ArgfsTer79)  | chr16      | 2,156,172  | 1           | 0          | 0          |              | rs538031465               | HS; Likely PB Artifact |
| <i>c.7401del</i>     | p.(Asn2468ThrfsTer152) | chr16      | 2,156,486  | 7           | 0          | 0          |              | rs745812853               | HS; Likely PB Artifact |
| <i>c.6759del</i>     | p.(Glu2254SerfsTer60)  | chr16      | 2,158,408  | 18          | 0          | 0          |              |                           | HS; Likely PB Artifact |
| <i>c.6469del</i>     | p.(Leu2157CysfsTer4)   | chr16      | 2,158,698  | 1           | 0          | 0          |              |                           | HS; Likely PB Artifact |
| <i>c.5824del</i>     | p.(Arg1942AlafsTer7)   | chr16      | 2,159,343  | 18          | 0          | 0          |              | rs780100275               | HS; Likely PB Artifact |
| <i>c.5784del</i>     | p.(Glu1929ArgfsTer20)  | chr16      | 2,159,383  | 1           | 0          | 0          |              |                           | HS; Likely PB Artifact |
| <i>c.4485del</i>     | p.(Ala1496ProfsTer38)  | chr16      | 2,160,682  | 1           | 0          | 0          |              | rs578064441               | HS; Likely PB Artifact |
| <i>c.4269del</i>     | p.(Thr1424ProfsTer8)   | chr16      | 2,160,898  | 1           | 0          | 0          |              |                           | HS; Likely PB Artifact |
| <i>c.4220del</i>     | p.(Pro1407ArgfsTer25)  | chr16      | 2,160,947  | 3           | 0          | 0          |              | rs140412120               | HS; Likely PB Artifact |
| <i>c.4069del</i>     | p.(Leu1357TrpfsTer9)   | chr16      | 2,161,098  | 16          | 0          | 0          | DP           | CD085910                  | HS; Likely PB Artifact |
| <i>c.3684del</i>     | p.(Val1229TrpfsTer44)  | chr16      | 2,161,483  | 6           | 0          | 0          | DP           | rs781384791               | HS; Likely PB Artifact |
| <i>c.3240del</i>     | p.(Ser1081ArgfsTer23)  | chr16      | 2,162,395  | 2           | 0          | 0          |              | rs777145613               | HS; Likely PB Artifact |
| <i>c.3099del</i>     | p.(Asn1034MetfsTer4)   | chr16      | 2,162,850  | 12          | 0          | 0          | DP           | rs372461622               | HS; Likely PB Artifact |
| <i>c.2854-5del</i>   | p.?                    | chr16      | 2,163,297  | 19          | 0          | 0          |              | rs114846412               | HS; Likely PB Artifact |
| <i>c.2823del</i>     | p.(Glu942ArgfsTer9)    | chr16      | 2,164,200  | 1           | 0          | 0          |              | rs767322474               | HS; Likely PB Artifact |

|                    |                       |       |            |    |   |   |    |             |                        |
|--------------------|-----------------------|-------|------------|----|---|---|----|-------------|------------------------|
| <i>c.2494del</i>   | p.(Arg832AlafsTer66)  | chr16 | 2,164,529  | 19 | 0 | 0 | DP |             | HS; Likely PB Artifact |
| <i>c.2222del</i>   | p.(Pro741ArgfsTer44)  | chr16 | 2,164,801  | 1  | 0 | 0 |    | rs779605081 | HS; Likely PB Artifact |
| <i>c.2085del</i>   | p.(Ala696ArgfsTer89)  | chr16 | 2,165,390  | 19 | 0 | 0 |    | rs760496344 | HS; Likely PB Artifact |
| <i>c.2037del</i>   | p.(Tyr680MetfsTer105) | chr16 | 2,165,438  | 13 | 0 | 0 |    |             | HS; Likely PB Artifact |
| <i>c.1987del</i>   | p.(Gln663ArgfsTer122) | chr16 | 2,165,488  | 11 | 0 | 0 | DP |             | HS; Likely PB Artifact |
| <i>c.1914del</i>   | p.(Ala639ArgfsTer146) | chr16 | 2,165,561  | 11 | 0 | 0 | DP | rs777208671 | HS; Likely PB Artifact |
| <i>c.1386-3del</i> | p.?                   | chr16 | 2,167,056  | 11 | 0 | 0 |    |             | HS; Likely PB Artifact |
| <i>c.1221del</i>   | p.(Ser408ArgfsTer57)  | chr16 | 2,167,653  | 4  | 0 | 0 |    | rs768893401 | HS; Likely PB Artifact |
| <i>c.771del</i>    | p.(Thr258ProfsTer32)  | chr16 | 2,168,221  | 11 | 0 | 0 |    |             | HS; Likely PB Artifact |
| <i>c.755del</i>    | p.(Pro252ArgfsTer38)  | chr16 | 2,168,237  | 19 | 0 | 0 |    |             | HS; Likely PB Artifact |
| <i>c.198del</i>    | p.(Ala67ArgfsTer6)    | chr16 | 2,185,492  | 1  | 0 | 0 |    |             | HS; Likely PB Artifact |
| <i>c.108del</i>    | p.(Cys37AlafsTer36)   | chr16 | 2,185,582  | 14 | 0 | 0 |    |             | HS; Likely PB Artifact |
| <i>c.78del</i>     | p.(Arg28AlafsTer45)   | chr16 | 2,185,612  | 13 | 0 | 0 |    |             | HS; Likely PB Artifact |
| <b>PKD2</b>        |                       |       |            |    |   |   |    |             |                        |
| <i>c.128del</i>    | p.(Pro43ArgfsTer74)   | chr4  | 88,929,012 | 2  | 0 | 0 | DP | CD982885    | HS; Likely PB Artifact |
| <i>c.203del</i>    | p.(Pro68ArgfsTer49)   | chr4  | 88,929,087 | 19 | 0 | 0 | DP | rs751221093 | HS; Likely PB Artifact |
| <i>c.538del</i>    | p.(Leu180TrpfsTer53)  | chr4  | 88,929,422 | 6  | 0 | 0 |    |             | HS; Likely PB Artifact |
| <i>c.783del</i>    | p.(Val262CysfsTer55)  | chr4  | 88,957,444 | 6  | 0 | 0 |    | rs766343471 | HS; Likely PB Artifact |
| <i>c.1003del</i>   | p.(Gln335ArgfsTer3)   | chr4  | 88,959,561 | 18 | 0 | 0 |    |             | HS; Likely PB Artifact |

\* DP=Definitely Pathogenic; LN=Likely Neutral; C=Common; HS=Homopolymer Stretch; PB=PacBio; O=Overlap.

\*\* RefSeq NM\_001009944.2 or NM\_000297.3 for PKD1 and PKD2, respectively.
